# Supplementary material
Source: Springer Nature journal article supplement (https://www.springermedizin.de/resource/supplementary/12943_2014_1312_MOESM8_ESM.pdf/9552674)
Supplement: MOESM8 [file 9552674]

**Table 1.** Demographic and clinical characteristics of 82 NSCLC patients

| Characteristics         | No. of patients (%) |
|-------------------------|---------------------|
| Age at diagnosis        | 65.3 ± 9.5          |
| Sex                     |                     |
| Male                    | 53 (64.6)           |
| Female                  | 29 (3.45)           |
| Race                    |                     |
| White                   | 58 (70.7)           |
| Black                   | 19 (23.2)           |
| Others                  | 75 (6.1)            |
| Smoker                  |                     |
| Yes                     | 75 (91.5)           |
| No                      | 7 (8.5)             |
| Tumor histology         |                     |
| Squamous cell carcinoma | 34 (41.5)           |
| Adenocarcinoma          | 48 (58.5)           |
| T stage                 |                     |
| I                       | 27 (32.9)           |
| II                      | 28 (34.2)           |
| III-IV                  | 27 (32.9)           |

NSCLC, non-small cell lung cancer.
